# Supplementary material for: Promoting healthy eating and physical activity among school children: findings from Health-E-PALS, the first pilot intervention from Lebanon
Source: PubMed Central journal article supplement (PMC4167260; doi:10.1186/1471-2458-14-940), 2014-09-10

File 1: Final Questionnaire

|                                                                                                          |                                                                                                                                                                                                                                                                                                                                                                                                                  |
|----------------------------------------------------------------------------------------------------------|------------------------------------------------------------------------------------------------------------------------------------------------------------------------------------------------------------------------------------------------------------------------------------------------------------------------------------------------------------------------------------------------------------------|
| 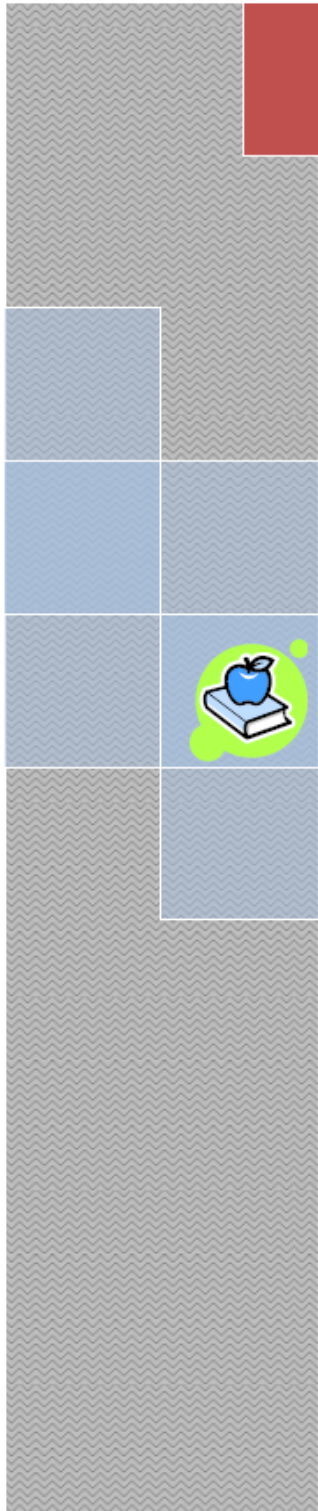                       | <h1>STUDENT<br/>QUESTIONNAIRE</h1> <h2>YOUR HEALTHY HABITS</h2>                                                                                                                                                                                                                                                                                                                                                  |
|                                                                                                          | School Name:                                                                                                                                                                                                                                                                                                                                                                                                     |
|                                                                                                          | Student name:                                                                                                                                                                                                                                                                                                                                                                                                    |
|                                                                                                          | Date:                                                                                                                                                                                                                                                                                                                                                                                                            |
|                                                                                                          | <p>Dear student,</p> <p>Thank you for taking the time to fill the attached questionnaire.</p> <ul style="list-style-type: none"><li>• The following questions are about your eating and exercise habits</li><li>• Please fill in your answers as honestly as possible</li><li>• If you find difficulties with any of the questions, do not hesitate to ask for help.</li></ul> <p>Best of luck,</p> <p>Carla</p> |
| Carla Habib Mourad  |                                                                                                                                                                                                                                                                                                                                                                                                                  |

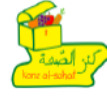

Circle the answer that mostly fits with your daily habits.

1- Do you usually have breakfast?

- 1) Never
- 2) Sometimes
- 3) Yes, every day

2- Do you usually have lunch?

- 1) Never
- 2) Sometimes
- 3) Yes, every day

3- Do you usually have dinner?

- 1) Never
- 2) Sometimes
- 3) Yes, every day

4- Do you usually have snacks between your meals?

- 1) Yes
- 2) No

5- if yes, do you take any of these snacks between your meals (at school or at home)?

- 1) fruits
- 2) chocolate or cookies
- 3) soft drinks
- 4) juice
- 5) chips
- 6) cheese sandwich

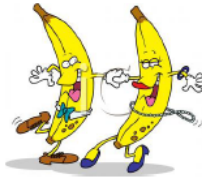

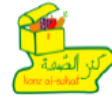

6- How many snacks do you have a day?

- 1) One
- 2) Two
- 3) Three or more

7- Do you buy food from your school shop?

- 1) yes
- 2) no

8- What do you buy from your school shop?

- 1) Chocolate or cookies
- 2) Juice
- 3) Soft drinks
- 4) Water
- 5) Croissant
- 6) Manoushe
- 7) Chips or peanuts

9- Do you bring food with you to school from home?

- 1) Yes
- 2) No

10- Do you choose what to put in your lunch box?

- 1) Yes
- 2) No
- 3) Sometimes

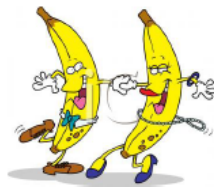

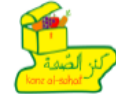

- 11- How many times a week you eat outside home or have a delivery meal?
- 1) 3 or more times per week
  - 2) Twice per week
  - 3) Once per week
  - 4) Never
- 12- Do you choose some of the foods your parents buy from the supermarket?
- 1) Yes
  - 2) No
- 13- Do you watch TV during school days?
- 1) I watch TV a lot everyday
  - 2) I watch TV a little before I go to sleep
  - 3) I don't watch TV
- 14- Do you watch TV during week- ends?
- 1) All day
  - 2) Twice a day
  - 3) Once a day
  - 4) I don't watch TV
- 15- Do you eat while watching TV?
- 1) All the time
  - 2) Sometimes
  - 3) No

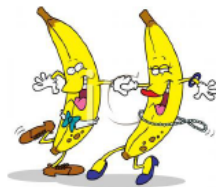

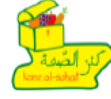

- 16- What do you play at school during recess?
- 1) I don't play
  - 2) I play ball games
  - 3) Jumping rope
  - 4) I run or play "catch me if you can"
  - 5) Other
- 17- Do you play at home after school?
- 1) Yes
  - 2) No
  - 3) Sometimes
- 18- If yes, what do you play at home after school?
- 1) I don't play
  - 2) I play ball games
  - 3) I ride my bike or my rollers/skates
- 19- How many days a week do you have sports/exercise sessions at school?
- 1) Not one day
  - 2) One day
  - 3) Two days
  - 4) More than three
- 20- Do you participate in the exercise sessions at school?
- 1) I don't participate at all
  - 2) Sometimes
  - 3) Yes, every time

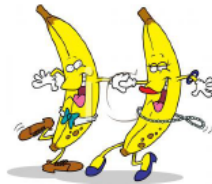

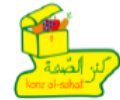

- 21- How many times per week do you do sports (Football, Basket Ball, Dance, Judo, Swimming...) after school or during the week-end?
- 1) I don't
  - 2) Once per week
  - 3) 2 times per week
  - 4) 3 times or more
- 22- Do you play computer games; Play station, PSP, Nintendo after school?
- 1) Every day for a long time
  - 2) Every day for a short time
  - 3) 2-3 times a week
  - 4) I don't play
- 23- Do you play computer games; Play station, PSP, Nintendo during week-ends? (You can choose more than one answer)
- 1) All day
  - 2) Twice a day
  - 3) Once a day
  - 4) I don't play
- 24- From which type of food you should eat the *least*?(choose only one type of food)
- 1) Bread, rice and pasta
  - 2) Milk, cheese and yogurt
  - 3) Sweets, fats and oils
  - 4) Fruits and vegetables
  - 5) Meat, chicken and eggs
  - 6) I don't know

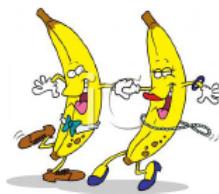

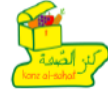

- 25- From which type of food you should eat the *most*?(choose only one)
- 1) Bread, rice and pasta
  - 2) Milk, cheese and yogurt
  - 3) Sweets, fats and oils
  - 4) Fruits and vegetables
  - 5) Meat, chicken and eggs
  - 6) I don't know
- 26- How many servings of fruits and vegetables you should have a day?
- 1) One
  - 2) 2 or 3
  - 3) 4 or 5
  - 4) 5 or more
  - 5) I don't know
- 27- Eating breakfast helps me do well in class.
- 1) Yes always
  - 2) Sometimes
  - 3) No, never
- 28- The best fluid for my body is: (*choose one answer*)
- 1) Water
  - 2) Juice
  - 3) Soft drinks
  - 4) I don't know
- 29- Juice and soft drinks cause dental caries.
- 1) Yes
  - 2) No
  - 3) I don't know

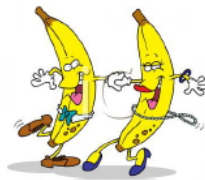

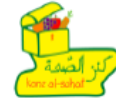

30- Chocolate and candies cause dental caries.

- 1) Yes
- 2) No
- 3) I don't know

31- Which of these foods have less fat?

- 1) fried potatoes
- 2) baked potatoes
- 3) I don't know

32 - Which of these foods have less fat?

- 1) croissant
- 2) corn flakes
- 3) I don't know

33- Which of these foods have less fat?

- 1) chips
- 2) pop corn
- 3) I don't know

34-Which of these foods have less sugar?

- 1) soft drinks
- 2) Milk
- 3) I don't know

35 - Which of these foods have less sugar?

- 1) doughnuts
- 2) corn flakes
- 3) I don't know

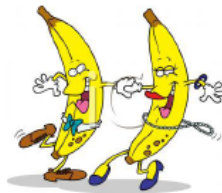



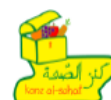

36 - Which of these foods have less sugar?

- 1) fresh juice
- 2) tang (artificial juice)
- 3) I don't know

37-For my health, I should exercise :

- 1) every day
- 2) once a week
- 3) twice a week
- 4) I don't know

38- How sure are you that you can prepare a healthy breakfast by yourself?

- 1) Very sure
- 2) Little sure
- 3) Not sure

39 - How sure are you that you can prepare a healthy snack by yourself?

- 1) Very sure
- 2) Little sure
- 3) Not sure

40 -How sure are you that you can drink less sweet and soft drinks?

- 1) Very sure
- 2) Little sure
- 3) Not sure

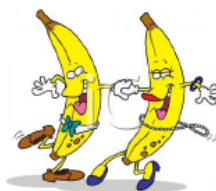

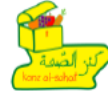

41 -How sure are you that you can do more sports during the week?

- 1) Very sure
- 2) Little sure
- 3) Not sure

42 -How sure are you that you can eat more fruits a day?

- 1) Very sure
- 2) Little sure
- 3) Not sure

43 -How sure are you that you can eat more vegetables a day?

- 1) Very sure
- 2) Little sure
- 3) Not sure

44 -How sure are you that you can eat breakfast every day?

- 1) Very sure
- 2) Little sure
- 3) Not sure

45 -How sure are you that you can eat a fruit instead of another snack during the day?

- 1) Very sure
- 2) Little sure
- 3) Not sure

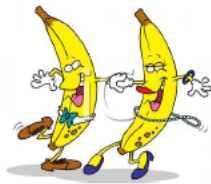

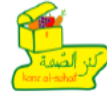

46-How sure are you that you can spend less time playing computer and PlayStation games?

- 1) Very sure
- 2) Little sure
- 3) Not sure

47 -The food I eat can affect my health.

- 1) Yes
- 2) No
- 3) I don't know

48 -The foods that I eat now are healthy.

- 1) Yes
- 2) No
- 3) I don't know

49 -People who weigh more than they should, may have health problems

- 1) Yes
- 2) No
- 3) I don't know

---

Thank you

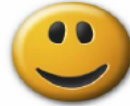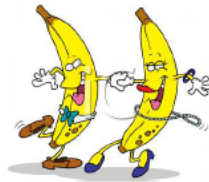

Supplement: 12889_2014_7033_MOESM1_ESM.pdf [file 12889_2014_7033_MOESM1_ESM.pdf]
